WINTER 2024 | VOLUME 36 | NUMBER 1

The Journal of  
**Neuropsychiatry**  
and Clinical Neurosciences

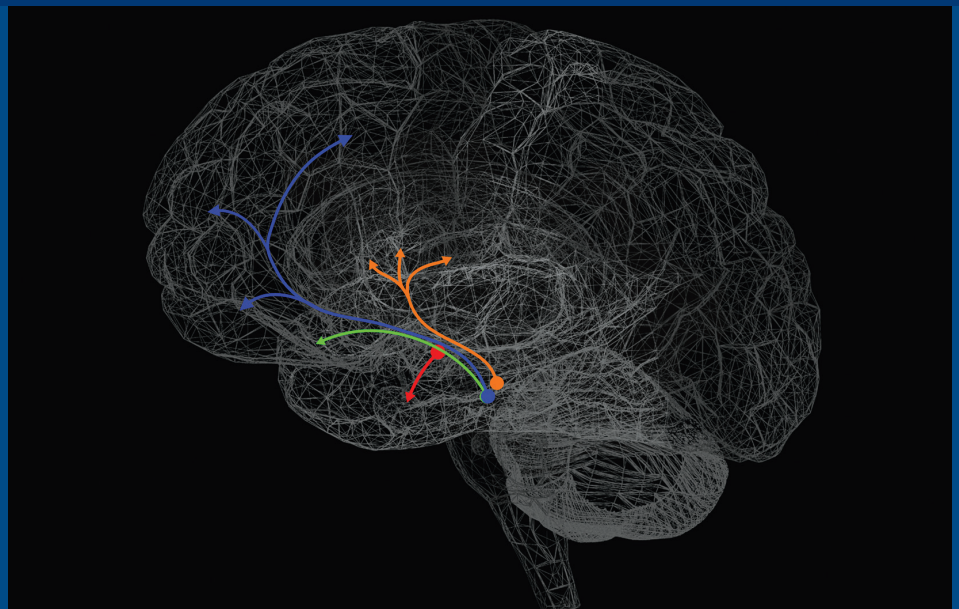

Online Core Curriculum and Mastery (OCCAM): A Behavioral  
Neurology & Neuropsychiatry (BNNP) Curricular  
Needs Assessment

Dual Residency Training in Neurology and Psychiatry:  
History and Current Practice

Poststroke Depression: An Update

Network Localization of Spontaneous Confabulation

Novel Oppositional Defiant Disorder or Conduct Disorder  
24 Months After Traumatic Brain Injury in Children  
and Adolescents

Official Journal of the American Neuropsychiatric Association  
[neuro.psychiatryonline.org](http://neuro.psychiatryonline.org)
